# Supplementary material for: Lapachol, a compound targeting pyrimidine metabolism, ameliorates experimental autoimmune arthritis
Source: Springer Nature journal article supplement (doi:10.1186/s13075-017-1236-x), 2017-03-07
Supplement: MOESM1 [file 12127074]

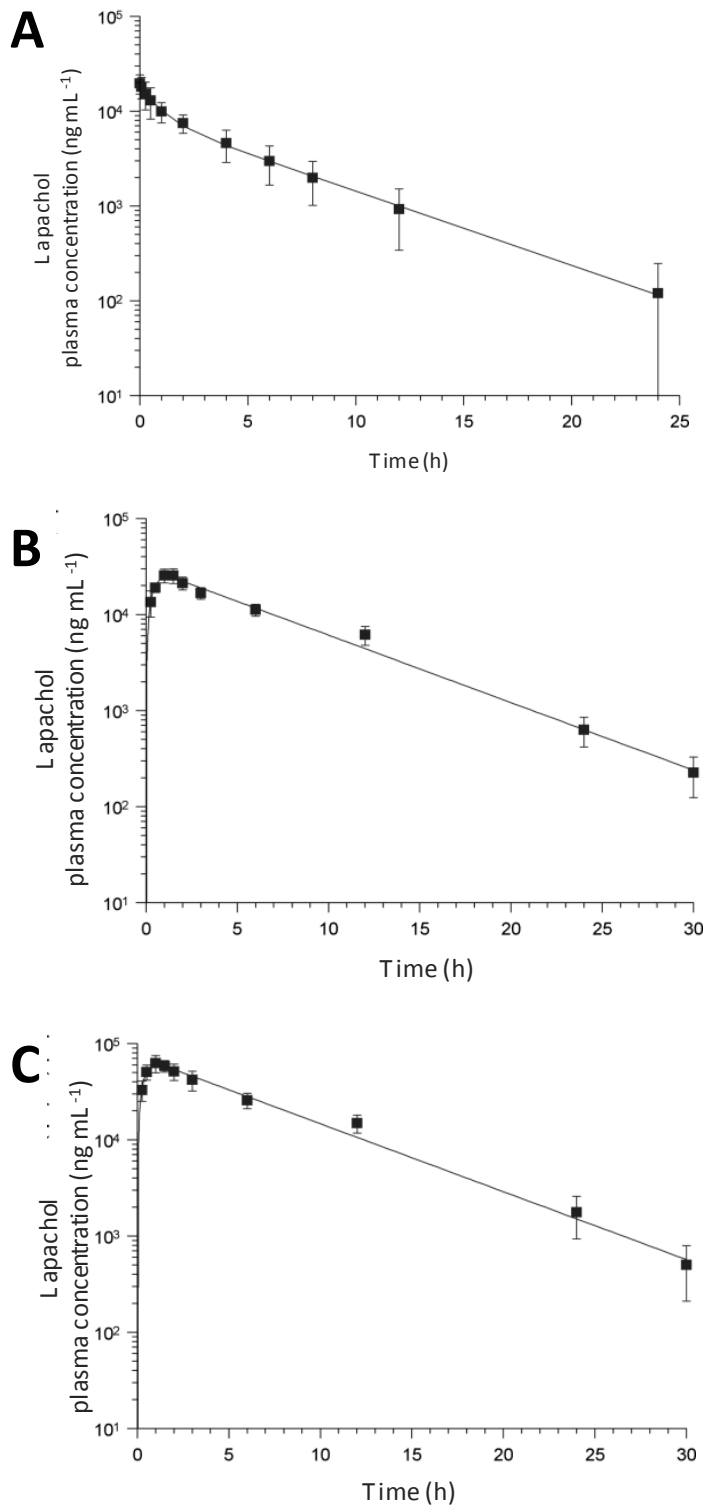

**Fig. S1.** Mean Concentration-time profiles of lapachol after (A) 2 mg/kg i.v., (B) 10 mg/kg oral and (C) 25 mg/kg oral administration to rats. Data points are mean  $\pm$  standard deviation.
