# Supplementary material for: Lapachol, a compound targeting pyrimidine metabolism, ameliorates experimental autoimmune arthritis
Source: Springer Nature journal article supplement (doi:10.1186/s13075-017-1236-x), 2017-03-07
Supplement: MOESM2 [file 12127074]

**Table S1.** LAP and LAP sodium salt pharmacokinetic parameters determined by non-compartmental and compartmental approaches after i.v. administration of 2 mg/kg in Wistar rats

| Pharmacokinetic Parameters                                  | LAP             |                 | LAP sodium salt |                 |
|-------------------------------------------------------------|-----------------|-----------------|-----------------|-----------------|
|                                                             | NCA             | 2-Comp          | NCA             | 2-Comp          |
| a ( $\mu\text{g/mL}$ )                                      | -               | 10.0 $\pm$ 4.1  | -               | 11.0 $\pm$ 14.7 |
| b ( $\mu\text{g/mL}$ )                                      | -               | 8.8 $\pm$ 3.1   | -               | 9.8 $\pm$ 1.9   |
| $\alpha$ ( $\text{h}^{-1}$ )                                | -               | 1.76 $\pm$ 1.52 | -               | 8.6 $\pm$ 6.8   |
| $\beta$ ( $\text{h}^{-1}$ )                                 | -               | 0.19 $\pm$ 0.03 | -               | 0.20 $\pm$ 0.03 |
| $\lambda$ ( $\text{h}^{-1}$ )                               | 0.18 $\pm$ 0.04 | -               | 0.30 $\pm$ 0.11 |                 |
| $t_{1/2\alpha}$ (h)                                         | -               | 0.6 $\pm$ 0.4   | -               | 0.19 $\pm$ 0.16 |
| $t_{1/2\beta}$ (h)                                          | -               | 3.7 $\pm$ 0.5   | -               | 3.5 $\pm$ 0.5   |
| $t_{1/2}$ (h)                                               | 4.1 $\pm$ 1.1   | -               | 2.5 $\pm$ 0.8   | -               |
| AUC <sub>0-<math>\infty</math></sub> ( $\mu\text{g h/mL}$ ) | 56.1 $\pm$ 20.1 | 56.4 $\pm$ 21.6 | 54.5 $\pm$ 26.8 | 50.8 $\pm$ 11.8 |
| CL <sub>tot</sub> (L/kg)                                    | 0.04 $\pm$ 0.01 | 0.04 $\pm$ 0.01 | 0.04 $\pm$ 0.02 | 0.04 $\pm$ 0.01 |
| Vc (L/kg)                                                   | -               | 0.11 $\pm$ 0.03 | -               | 0.12 $\pm$ 0.06 |
| Vd <sub>ss</sub> (L/kg)                                     | 0.19 $\pm$ 0.03 | 0.17 $\pm$ 0.03 | 0.29 $\pm$ 0.17 | 0.20 $\pm$ 0.04 |
| MRT (h)                                                     | 5.3 $\pm$ 1.2   | -               | 6.5 $\pm$ 4.1   | 4.9 $\pm$ 0.8   |

LAP sodium salt (n =6); LAP (n = 7).
