# Supplementary material for: Lapachol, a compound targeting pyrimidine metabolism, ameliorates experimental autoimmune arthritis
Source: Springer Nature journal article supplement (doi:10.1186/s13075-017-1236-x), 2017-03-07
Supplement: MOESM3 [file 12127074]

**Table S2.** Pharmacokinetic parameters after oral administration of lapachol (10 mg/kg and 25 mg/kg) and LAP sodium salt (30 mg/kg) in Wistar rats

| Pharmacokinetic Parameter               | 10 mg/kg oral LAP |                  | 25 mg/kg oral LAP |                  | 30 mg/kg oral LAP sodium salt |                 |
|-----------------------------------------|-------------------|------------------|-------------------|------------------|-------------------------------|-----------------|
|                                         | NCA               | 1-Comp           | NCA               | 1-Comp           | NCA                           | 1- Comp         |
| $C_{max}$ ( $\mu\text{g/mL}$ )          | 31.6 $\pm$ 3.8    | -                | 65.6 $\pm$ 10.6   | -                | 55.9 $\pm$ 25.8               | -               |
| $t_{max}$ (h)                           | 1.2 $\pm$ 0.3     | -                | 1.3 $\pm$ 0.4     | -                | 1.6 $\pm$ 1.1                 | -               |
| $Ka$ ( $\text{h}^{-1}$ )                | -                 | 2.61 $\pm$ 0.85  | -                 | 2.93 $\pm$ 0.79  | -                             | 1.04 $\pm$ 1.02 |
| $Ke$ ( $\text{h}^{-1}$ )                | -                 | 0.17 $\pm$ 0.01  | -                 | 0.16 $\pm$ 0.02  | -                             | 0.25 $\pm$ 0.15 |
| $l$ ( $\text{h}^{-1}$ )                 | 0.16 $\pm$ 0.01   | -                | 0.19 $\pm$ 0.03   | -                | 0.19 $\pm$ 0.07               | -               |
| $t_{1/2}$ (h)                           | 3.2 $\pm$ 0.2     | -                | 3.6 $\pm$ 0.5     | -                | 4.3 $\pm$ 2.0                 | -               |
| $t_{1/2\beta}$ (h)                      | -                 | 4.2 $\pm$ 0.3    | -                 | 4.4 $\pm$ 0.6    | -                             | 3.6 $\pm$ 2.0   |
| $AUC_{0-\infty}$ ( $\mu\text{g h/ml}$ ) | 216.9 $\pm$ 22.0  | 237.4 $\pm$ 20.2 | 449 $\pm$ 78.1    | 434.3 $\pm$ 79.7 | 315.2 $\pm$ 140               | 314 $\pm$ 143.8 |
| $CL_{tot}$ (L/kg)                       | 0.04 $\pm$ 0.01   | 0.03 $\pm$ 0.03  | 0.04 $\pm$ 0.01   | 0.04 $\pm$ 0.01  | 0.04 $\pm$ 0.02               | 0.05 $\pm$ 0.03 |
| $Vd_{ss}$ (L/kg)                        | -                 | 0.19 $\pm$ 0.02  | -                 | 0.24 $\pm$ 0.04  | -                             | 0.20 $\pm$ 0.09 |
| MRT (h)                                 | 7.2 $\pm$ 0.6     | -                | 7.2 $\pm$ 0.7     | -                | 6.5 $\pm$ 2.8                 | -               |
| $F_{abs}$ (%)                           | 77                | -                | 65                | -                | 42                            | -               |

LAP (n = 8, 10 mg/kg); LAP (n = 6, 25 mg/kg); LAP sodium salt (n = 8, 30 mg/kg)
