# Supplementary material for: Lapachol, a compound targeting pyrimidine metabolism, ameliorates experimental autoimmune arthritis
Source: Springer Nature journal article supplement (doi:10.1186/s13075-017-1236-x), 2017-03-07
Supplement: MOESM4 [file 12127074]

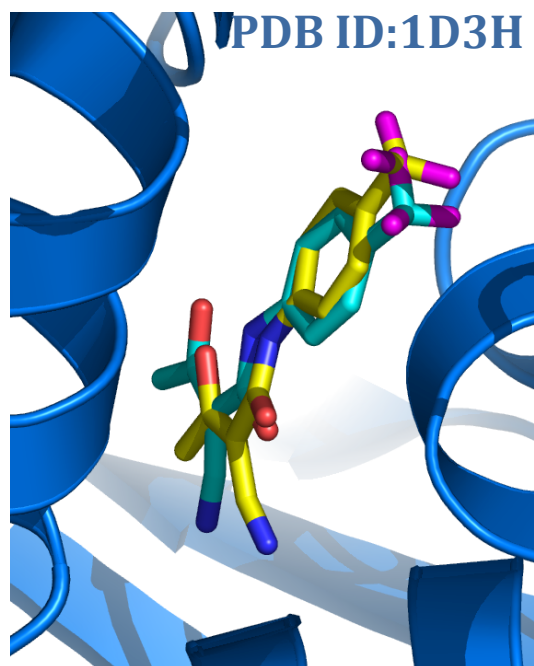

**Fig. S2.** Superimposition of the crystallographic hDHODH inhibitor A771726 (PDB id:1D3H, carbon atoms in cyan) and the top-ranked docking solution (carbon atoms in yellow), inside the active site.
