# Supplementary material for: Lapachol, a compound targeting pyrimidine metabolism, ameliorates experimental autoimmune arthritis
Source: Springer Nature journal article supplement (doi:10.1186/s13075-017-1236-x), 2017-03-07
Supplement: MOESM5 [file 12127074]

**Table S3.** Evaluation of lapachol's toxicity in proliferating CD4 T cells

| <b>Groups</b>        | <b>Purified CD4 T cells</b>      |                                                |
|----------------------|----------------------------------|------------------------------------------------|
|                      | <b>Annexin V<sup>+</sup> (%)</b> | <b>Annexin V<sup>+</sup>PI<sup>+</sup> (%)</b> |
| Medium               | 13,31 ± 0,82                     | 5,31 ± 1,71                                    |
| Only anti-CD3        | 10,54 ± 0,68                     | 3,70 ± 0,14                                    |
| Leflunomide (10 µM)  | 11,08 ± 0,71                     | 3,90 ± 0,47                                    |
| Leflunomide (30 µM)  | 10,28 ± 0,64                     | 3,84 ± 0,54                                    |
| Leflunomide (100 µM) | 10,14 ± 0,27                     | 3,65 ± 0,71                                    |
| Lapachol (10 µM)     | 12,99 ± 0,47                     | 4,19 ± 0,53                                    |
| Lapachol (30 µM)     | 12,04 ± 1,42                     | 5,60 ± 1,00                                    |
| Lapachol (100 µM)    | 47,38 ± 10,53*                   | 27,58 ± 6,70*                                  |

\* P < 0,05; analysis of variance one-way nonparametric (ANOVA) followed by Bonferroni's t test
