# Supplementary material for: Lapachol, a compound targeting pyrimidine metabolism, ameliorates experimental autoimmune arthritis
Source: Springer Nature journal article supplement (doi:10.1186/s13075-017-1236-x), 2017-03-07
Supplement: MOESM7 [file 12127074]

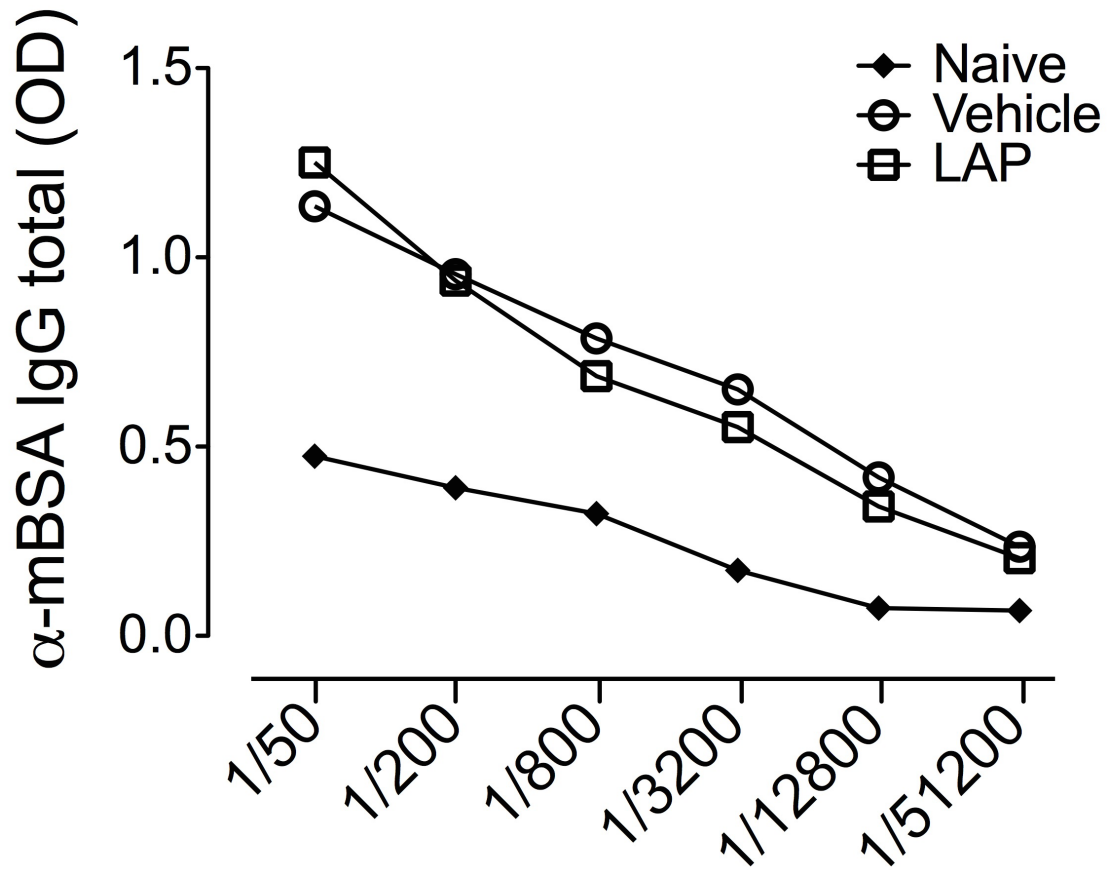

**Fig. S4.** Serum titers of anti-mBSA antibodies from LAP-treated mice on antigen-induced-arthritis (AIA). mBSA-immunized C57BL/6 mice were treated orally with LAP (10 mg/kg) or vehicle every day from 12-21 day after first immunization. The graph shows the anti-mBSA IgG levels in the serum from naive and mBSA-immunized mice treated or not with LAP on day 21.
